# Supplementary material for: What US hospitals are currently doing to prevent common device-associated infections: results from a national survey
Source: PubMed Central journal article supplement — BMJ Qual Saf. 2019 Apr 23;28(9):741–9. doi: 10.1136/bmjqs-2018-009111 (PMC6820292; doi:10.1136/bmjqs-2018-009111), 2019-04-23
Supplement: bmjqs-2018-009111supp001.pdf [file bmjqs-2018-009111supp001.pdf]

## Supplementary Material

Table: Comparison of CAUTI, CLABI, and VAP prevention practices in use at US hospitals between 2013 and 2017

| Prevention Practice                                                                     | 2013<br>(n=403) | 2017<br>(n=430*) | P      |
|-----------------------------------------------------------------------------------------|-----------------|------------------|--------|
| <b>CAUTI</b>                                                                            |                 |                  |        |
| Portable bladder ultrasound scanner for determining post-void residual                  | 56.4            | 74.8             | <0.001 |
| Urinary catheter reminder or stop-order                                                 | 53.3            | 61.8             | 0.02   |
| Nurse-initiated urinary catheter discontinuation                                        | 37.9            | 61.0             | <0.001 |
| Catheter reminder/discontinuation                                                       | 62.7            | 76.9             | <0.001 |
| Silver alloy Foley catheters                                                            | 31.1            | 27.6             | 0.29   |
| Condom catheters in men                                                                 | 13.4            | 29.8             | <0.001 |
| Aseptic technique during indwelling urethral catheter insertion and maintenance         | 93.7            | 89.6             | 0.04   |
| Intermittent catheterization                                                            | 30.8            | 49.8             | <0.001 |
| Established surveillance system for monitoring urinary tract infection rates            | 85.1            | 94.2             | <0.001 |
| <b>CLABSI</b>                                                                           |                 |                  |        |
| Maximum sterile barrier precautions during central catheter insertion                   | 98              | 98.1             | 0.97   |
| Alcohol containing chlorhexidine gluconate for antiseptis of the insertion site         | 98.8            | 99.8             | 0.09   |
| Antimicrobial catheters (i.e., chlorhexidine-silver sulfadiazine, minocycline-rifampin) | 32.2            | 41.7             | 0.01   |
| Antimicrobial dressing with chlorhexidine (Biopatch® disk or Tegaderm™ CHG)             | 78.2            | 90.0             | <0.001 |
| Established surveillance system for monitoring CLABSI rates                             | 89.9            | 93.5             | 0.07   |
| <b>VAP</b>                                                                              |                 |                  |        |
| Semi-recumbent positioning of the patient (head of bed elevated 30 degrees or more)     | 98.8            | 98.3             | 0.55   |
| Antimicrobial mouth rinse (e.g., Peridex®)                                              | 79.4            | 85.6             | 0.02   |
| Subglottic secretion drainage (via a special endotracheal tube)                         | 54.7            | 60.4             | 0.12   |
| Topical and/or systemic antibiotics for selective digestive tract decontamination       | 25.2            | 23.4             | 0.57   |
| Silver-coated endotracheal tube                                                         | 5.1             | 7.5              | 0.17   |
| “Sedation vacation” (e.g., regular interruption of sedation)                            | 83.1            | 88.1             | 0.05   |
| Established surveillance system for monitoring VAP rates                                | 95.7            | 93.4             | 0.19   |

Abbreviations: CAUTI = catheter-associated urinary tract infection, CLABSI = central line-associated bloodstream infection, VAP = ventilator-associated pneumonia.

\*A total of 98 hospitals responding to the 2017 survey with total bed sizes less than 50 were dropped, to ensure greater comparability to the sampling strategy used in 2013 (which did not include hospitals with total bed size less than 50). All presented values represent the percentage of hospitals reporting regular use (defined as responses of almost always (4) or always (5) from 5-point Likert response questions) of the prevention practice.
